# Supplementary material for: Studies on a niobia-supported VPO catalyst for glycerol dehydration
Source: Royal Society of Chemistry journal article supplement (doi:10.1039/d4nj02063d), 2024-01-01
Supplement: d4nj02063d1.pdf [file d4nj02063d1.pdf]

## Studies on a Niobia-supported VPO catalyst for Glycerol Dehydration

N. Pethan Rajan<sup>a</sup>, Srinivasa Rao Ginjupalli<sup>a,b</sup>, Sailaja Gadamsetti<sup>a,c</sup>, Putrakumar Balla<sup>a,d,\*</sup>, V R Chary Komandur<sup>a,\*</sup>

### Supplementary Information

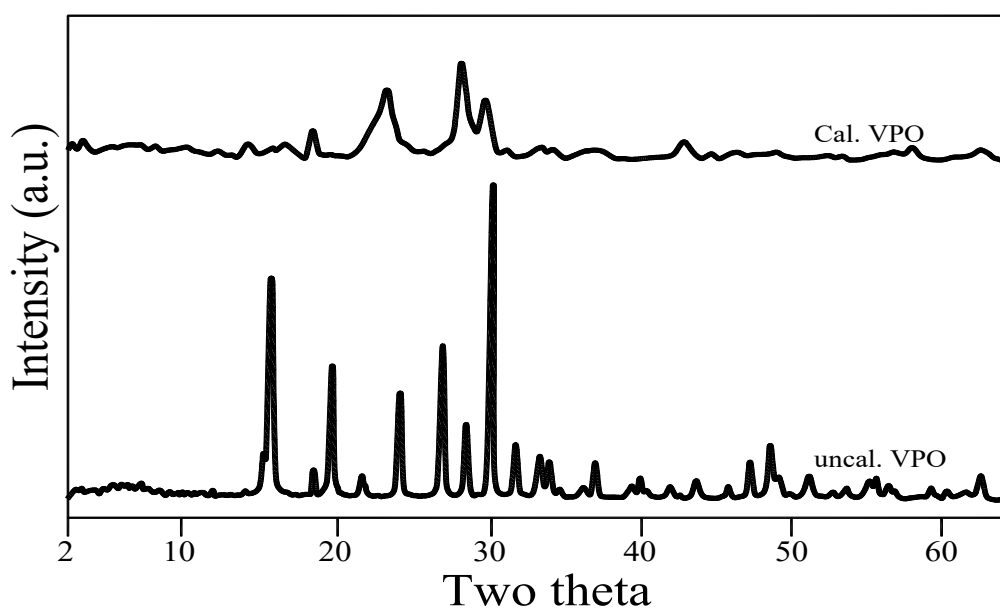

**Fig S1:** XRD patterns of pure uncalcined VPO and calcined pure VPO

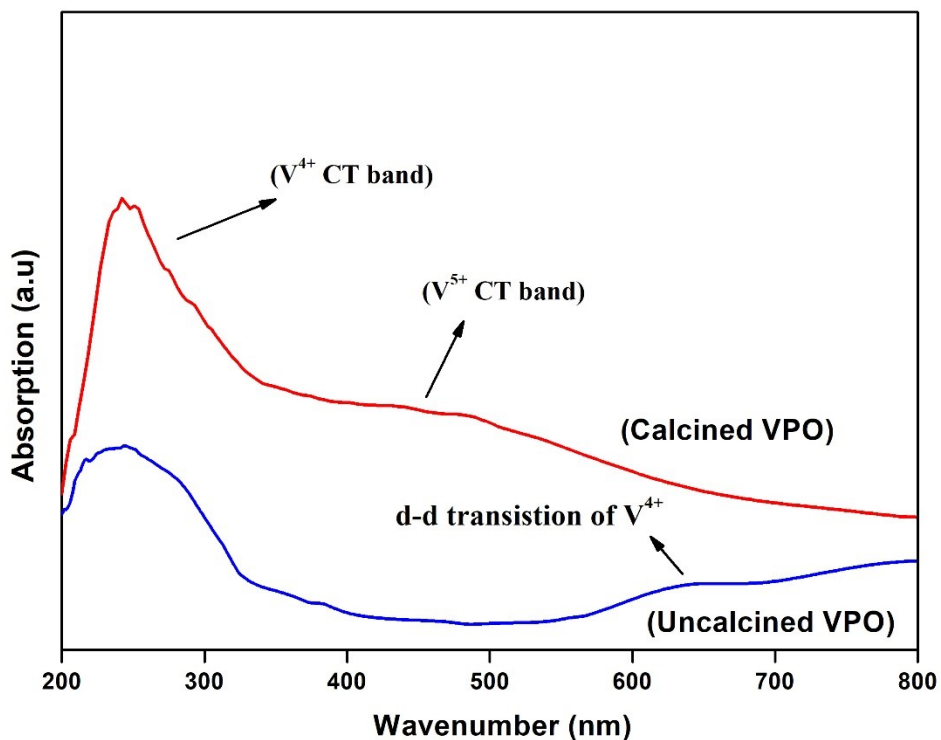

**Fig S2:** UV-DRS spectra of pure uncalcined and calcined VPO catalyst

**Table S1:** Physical properties of 5 wt% VPO/Nb catalyst over N<sub>2</sub> flow (N<sub>2</sub>) and air along with

N<sub>2</sub> flow (AN)

| S. No | VPO loadings            | Surface area (m <sup>2</sup> /g) | Pore Volume (cc/g) | Pore diameter (Å) |
|-------|-------------------------|----------------------------------|--------------------|-------------------|
| 1.    | 5 wt%                   | 46                               | 0.1013             | 87.92             |
| 2.    | 5 wt% (AN)              | 44                               | 0.0939             | 96.25             |
| 3.    | 5 wt% (N <sub>2</sub> ) | 39                               | 0.0820             | 71.37             |

**Table S2:** Elemental analysis results of 5 wt% VPO/Nb catalyst over N<sub>2</sub> and air along with

N<sub>2</sub> flow (AN)

| S.No | VPO loadings            | Carbon (%) | Hydrogen (%) | H/C ratio |
|------|-------------------------|------------|--------------|-----------|
| 1.   | 5 wt% (N <sub>2</sub> ) | 5.88       | 1.74         | 0.296     |
| 2.   | 5 wt% (AN)              | 1.88       | 0.88         | 0.468     |
